# Supplementary material
Source: MDPI journal article supplement (https://www.mdpi.com/1996-1073/12/13/2515)

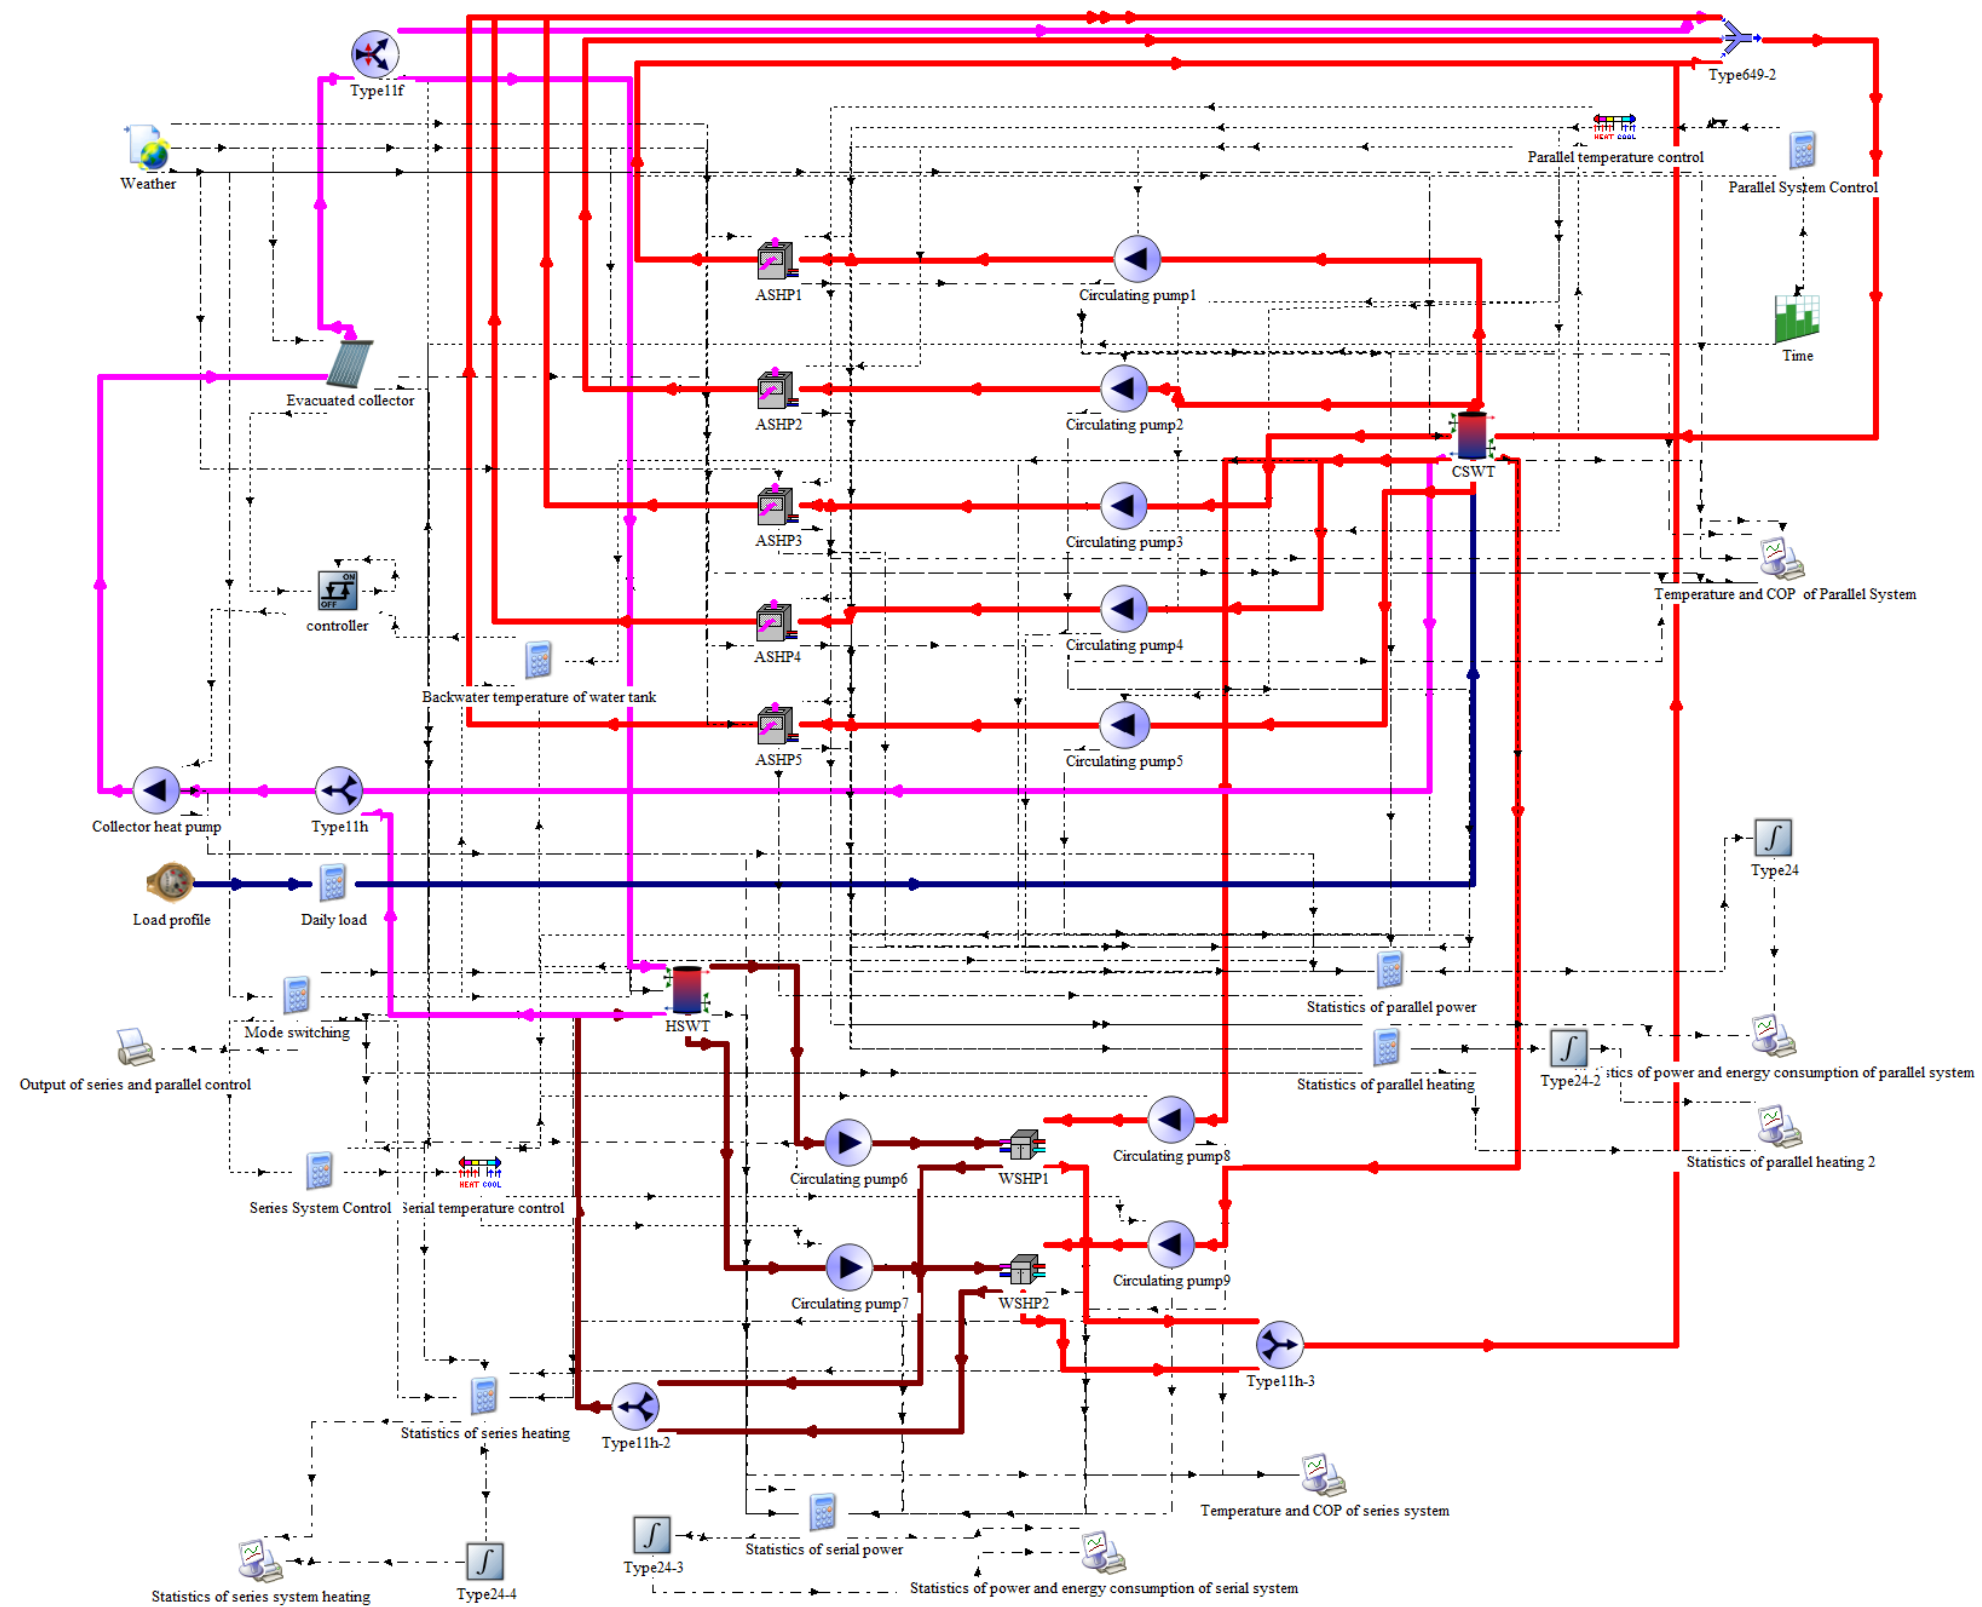

Figure S1. TRNSYS model of the combined SAHP system.

Supplement: s1 [file s1]
